# Supplementary material
Source: PubMed Central journal article supplement (PMC11386598)
Supplement: PBI-18-1955-s001.pdf [file PBI-18-1955-s001.pdf]

(a)

```

TL/Ag      ATGTGGCCCGACGTCGCATGCTCCCCGCACG--GCG-CCGCGGGAATTCGATTCCTTCA 56
P76        ATGGGGCCCGACGCCCGCTGCTCCCCGGACGATGGCGGCCGCGGGAATTCGATTCCTTCA 60
          *** ***** ** . ***** ** ** *****

TL/Ag      AGGAACAGCTCCAGGCAGCATGTGCGCGTCCACGCCATGGAGGCGGTGATGGCCTGCTGG 116
P76        AGGAACAGCTCCAGGCAGCATGTGCGCGTCCACGCCATGGAAGCGGTGATGGCCTGCTGG 120
          ***** . *****

TL/Ag      >>>>>>>>>
P76        GAGCTCGAGCAAACCTGTCAGAGTCTTACAGGGGCATCTCCTGGTGAAGGCACCGGGGCA 176
          GAGCTCGAGCAGACTTTGTCAGAGTCTTACAGGGGCATCTCCTGGTGAAGGCACCGGGGCA 180
          ***** . ** *****

TL/Ag      ACTATGTCCGATGACGAAGACAATCCGGTGCACAGTGAGAGCAACATGTTTCGACGGGAA 236
P76        ACTATGTCTGATGATGAAGACAATCCGGTGCACAGTGAGAGCAACATGTTTCGATGGAAA 240
          ***** ** ** ***** ** **

TL/Ag      CGATGTGTCAGATGGCATGGGCTTCGGAATGCTAACCGAGGGTGAGAGATCCTTGGTCTGA 296
P76        TGATGTGTCAGATGGCATGGGCTTTGGGATGCTAACCGAGGGTGAGAGATCCTTGGTCTGA 300
          ***** ** . *****

TL/Ag      GCGCGTGAGGCAAGAGCTGAAGCATGAGCTTAAACAGGGGTATAGAGAAAAGCTTGTGGA 356
P76        GCGCGTAAGGCAAGAGCTGAAGCATGAGCTTAAACAGGGGTACAGAGAAAAGCTTGTGGA 360
          ***** . *****

TL/Ag      CATCAGGGAGGAGATACTGCGGAAGCGAAGAGCCGGAAAGCTCCAGGGGACACG-CGTC 415
P76        CATCAGGGAGGAGATGCTGAGGAAGCGAAGAGCCGGAAAGCTCCAGGAGACACGGCGTC 420
          ***** . ** . *****

TL/Ag      TACCCTGAAAGCTTGGTGGCAAGCCCACGCCAAATGGCCGTACCCAACCTGAGGAGGACAA 475
P76        TACTCTGAAGGCTTGGTGGCAAGCCCACGCCAAATGGCCGTACCCAACCTGAGGAGGACAA 480
          ** ***** . *****

TL/Ag      GGC GCGGCTGGTGCAGGAGACGGGGCTGCAGCTGAAGTAGATCAACAACCTGGTTCATCAA 535
P76        GGC GCGGCTGGTTCAGGAAACAGGGCTGCAGCTGAAGCAGATCAACAACCTGGTTCATCAA 540
          ***** ***** . *****
          <<<<<<

TL/Ag      CCAGCGCAAGCGGAACTGGCACAGCAACCCTACCTCGTCCTCGTCAGACAAGAGCAAGAG 595
P76        CCAGCGCAAGCGGAACTGGCACAGCAACCCTACCTCGTCCTCATCAGACAAGAGCAAGAG 600
          ***** ***** . *****

TL/Ag      AAAAAAGGAACAATGCAGGTGAGGGCAACGCCGAGCAGTCCTGGTAG 641
P76        AAAAAAGGAACAATGCAGGTGACGGCAACGCCGAGCAGTCCTGGTAG 646
          ***** *****

```

(b)

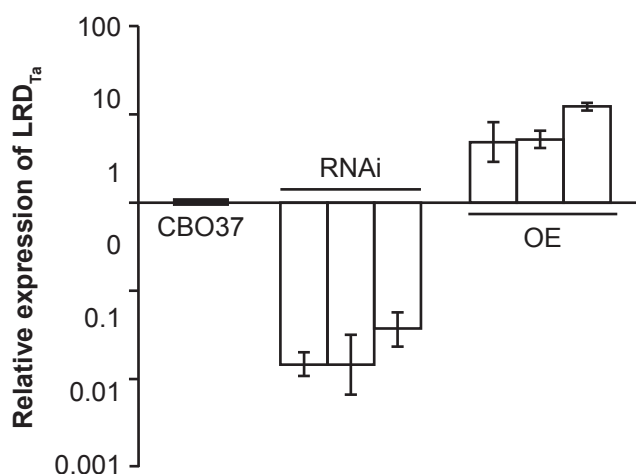

**Figure S1.** (a) Multiple sequence alignment of  $LRD_{TL/Ag}$  and  $LRD_{P76}$  coding sequences. (b) Confirmation of altered expression of  $LRD_{Ta}$  in the RNAi and OE plants.

**Figure S2**

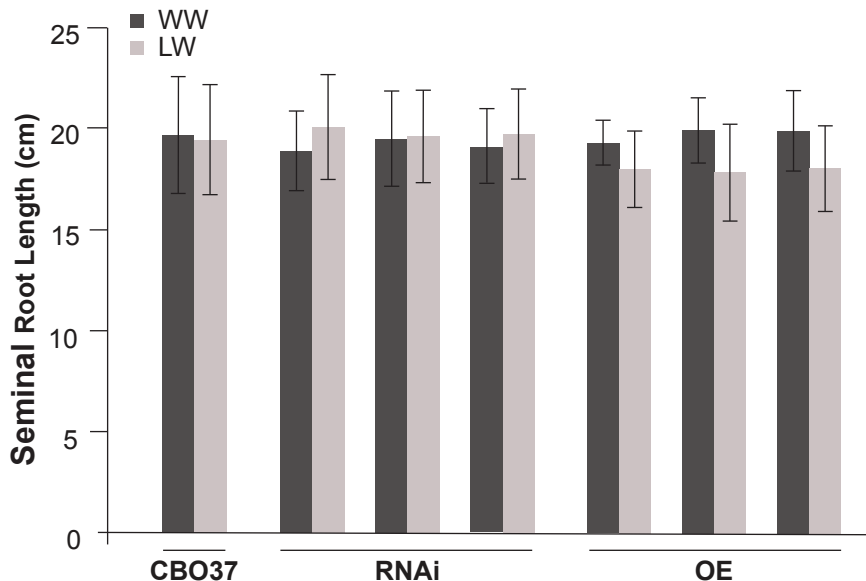

**Figure S2** Maximum seminal root length of wild type (CBO37), 3 RNAi and 3 overexpression 6 d old seedlings grown in cigar-rolls under well-watered (WW) and limited water (LW) conditions.

**Figure S3**

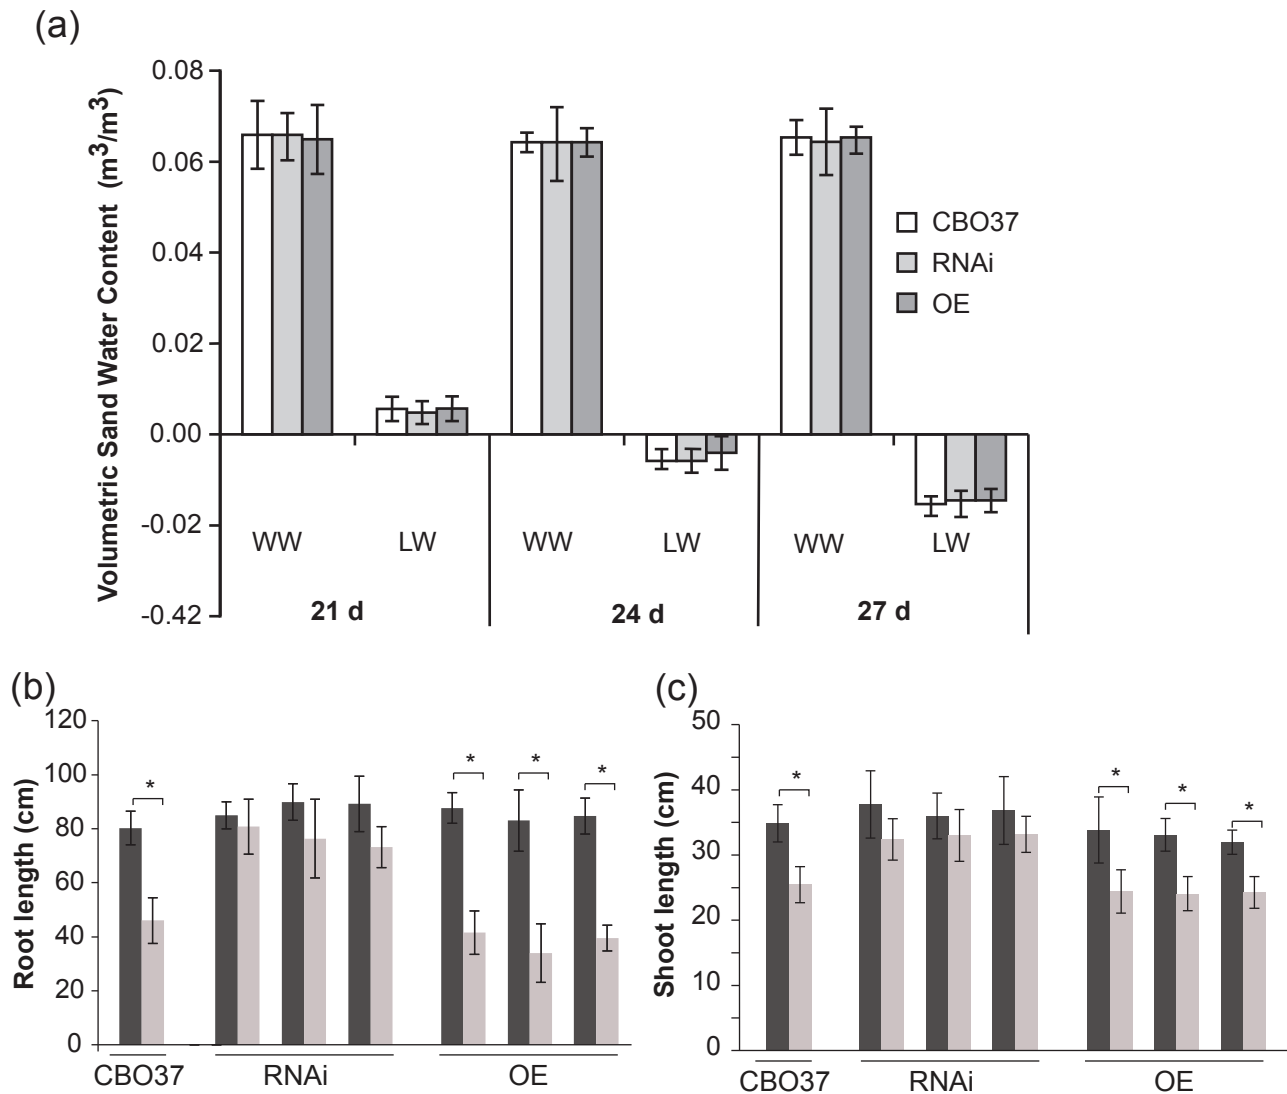

**Figure S3.** (a) Sand moisture content in the pre-tillering water stress experiment. (b-c) Shoot (b) and root (c) length of pre-tillering stage CBO37, RNAi and OE plants grown in greenhouse under WW or LW conditions. “\*” indicates a significant difference between WW and LW treatment at  $p < 0.05$ .

**Figure S4**

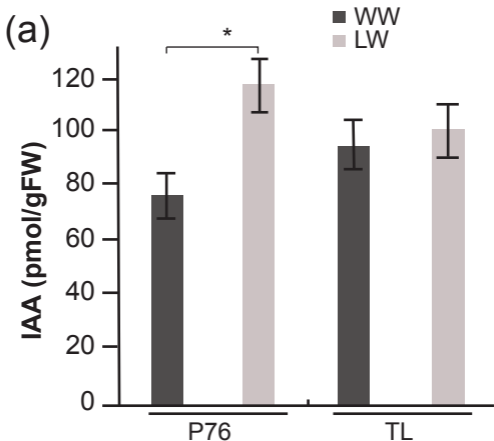

**Figure 4** Auxin levels in P76 and TL root tips under WW and LW. “\*” indicates a significant difference between WW and LW treatment at  $p < 0.05$ .

**Table S1.** Effect on GA bio-synthesis inhibitor Paclobutrazol (PAC) on root traits.

| <b>Genotypes, Treatments</b> | <b>Primary Root Length (cm)</b> | <b>Number of Lateral Roots</b> | <b>Lateral Root Density (cm<sup>-1</sup>)</b> |
|------------------------------|---------------------------------|--------------------------------|-----------------------------------------------|
| <b>P76, WW</b>               | 25.2 ± 2.4                      | 24 ± 3                         | 0.93 ± 0.1                                    |
| <b>P76, WW (+ PAC)</b>       | 25.3 ± 3.0                      | 11 ± 2 <sup>#</sup>            | 0.45 ± 0.1 <sup>#</sup>                       |
| <b>P76, LW</b>               | 20.3 ± 1.3 <sup>*</sup>         | 13 ± 3 <sup>*</sup>            | 0.55 ± 0.1 <sup>*</sup>                       |
| <b>P76, LW (+ PAC)</b>       | 24.2 ± 2.9                      | 5 ± 2 <sup>#</sup>             | 0.22 ± 0.1 <sup>#</sup>                       |
| <b>TL, WW</b>                | 26.9 ± 3.1                      | 25 ± 5                         | 0.91 ± 0.2                                    |
| <b>TL, WW (+ PAC)</b>        | 22.7 ± 2.4                      | 11 ± 2 <sup>#</sup>            | 0.49 ± 0.1 <sup>#</sup>                       |
| <b>TL, LW</b>                | 26.0 ± 6.0                      | 24 ± 7                         | 0.87 ± 0.2                                    |
| <b>TL, LW (+ PAC)</b>        | 23.9 ± 2.6                      | 10 ± 1 <sup>#</sup>            | 0.41 ± 0.1 <sup>#</sup>                       |

Roots traits were measured on 6 d old seedlings. “\*” indicates a significant difference between WW and LW treatment for P76 at  $p < 0.05$  and “#” indicates a significant difference between non-PAC and PAC-treated roots of each genotype at  $p < 0.05$ . The lateral root density and lateral root number were measured on primary root.

| <b>Table S2.</b> Primer sequences used for qRT-PCR. The underline indicate the sequence differences between $LRD_{Ta}$ and $LRD_{Ag}$ |                         |                                                        |                                |                          |
|---------------------------------------------------------------------------------------------------------------------------------------|-------------------------|--------------------------------------------------------|--------------------------------|--------------------------|
| <b>Wheat Gene ID</b>                                                                                                                  | <b>Gene Annotation</b>  | <b>Left Primer (5' to 3')</b>                          | <b>Right Primer (5' to 3')</b> | <b>Product size (bp)</b> |
| <i>LRD</i>                                                                                                                            | <i>LRD</i>              | CCTTCAAGGAACAGCTCCAG                                   | CTCTCACTGTCGACCGGATT           | 166                      |
| <i>LRD</i>                                                                                                                            | <i>LRD<sub>Ta</sub></i> | GTTT <u>G</u> A <u>C</u> G <u>G</u> GAA <u>C</u> GATGT | <u>A</u> TACCCCTGTTTAAGCTC     | 114                      |
| <i>LRD</i>                                                                                                                            | <i>LRD<sub>Ag</sub></i> | GTTC <u>G</u> A <u>T</u> GG <u>A</u> AA <u>T</u> GATGT | <u>G</u> TACCCCTGTTTAAGCTC     | 151                      |
| <i>Traes_3B_7ABEA6AAD</i>                                                                                                             | <i>GA2Ox</i>            | GTTCAAGAGCGTGGAAGCACA                                  | GTACTCGCCCCATGTGAAGT           | 163                      |
| <i>Traes_7DL_06A129B0D</i>                                                                                                            | <i>GA20Ox</i>           | ACATCGACGACACCTTCTCC                                   | ATCCAGGGTCCTCCAGTCAG           | 251                      |
|                                                                                                                                       | <i>Internal Control</i> | TGAGGTTGTCAAGCAACAGG                                   | CATAAGACCAGCCCAAGCAT           | 152                      |

**Table S3.** Primers pairs used for the construction of the LRD RNAi lines in CBO37 background.

| <b>Primer Name</b> | <b>Primer Sequence</b>                   | <b>Description of lower case bases</b> |
|--------------------|------------------------------------------|----------------------------------------|
| PUbi-Int-F         | 5' TTTTaaagcttGGTGCAGCGTG 3'             | HindIII site                           |
| PUbi-Sma-R         | 5' TTTTcccgggTTCTCGAGCGACCTGCAGAAG 3'    | SmaI site                              |
| T35S-SmaI-F        | 5' TTTTcccgggTAGAGTCCGCAAAAATCACC 3'     | SmaI site                              |
| T35S-EcoRI-R       | 5' TTTTgaattcGCAGGTCACTGGATTTTGGTT 3'    | EcoRI site                             |
| K369-BH1-F         | 5' TTTTggatccGCTGGGAGCTCGAGCAAA 3'       | BamHI site                             |
| K369-Xb1-R         | 5' TTTtctagaGCGCCTTGTCCTCCTCAGT 3'       | XbaI site                              |
| K369-SmaI-R        | 5' TTTTtctagaccgggGCGCCTTGTCCTCCTCAGT 3' | XbaI and SmaI sites                    |

**Table S4.** Dosage dependent effects on GA<sub>3</sub> on wheat root traits .

| <b>Genotypes, GA<sub>3</sub><br/>Concentration</b> | <b>Primary<br/>Root (cm)</b> | <b>Lateral Root<br/>Number</b> | <b>Lateral Root<br/>Density (cm<sup>-1</sup>)</b> |
|----------------------------------------------------|------------------------------|--------------------------------|---------------------------------------------------|
| <b>P76, 0</b>                                      | 27.2 ± 2.2                   | 17 ± 5                         | 0.58 ± 0.1                                        |
| <b>TL, 0</b>                                       | 26.3 ± 2.5                   | 17 ± 5                         | 0.66 ± 0.2                                        |
| <b>P76, 0.01</b>                                   | 27.1 ± 2.0                   | 20 ± 6                         | 0.74 ± 0.2                                        |
| <b>TL, 0.01</b>                                    | 26.1 ± 4.4                   | 21 ± 6                         | 0.82 ± 0.2                                        |
| <b>P76, 0.1</b>                                    | 27.7 ± 2.2                   | 17 ± 6                         | 0.62 ± 0.2                                        |
| <b>TL, 0.1</b>                                     | 29.2 ± 2.3                   | 31 ± 7*                        | 1.04 ± 0.2                                        |
| <b>P76, 1.0</b>                                    | 28.4 ± 2.3                   | 19 ± 7                         | 0.67 ± 0.2                                        |
| <b>TL, 1.0</b>                                     | 28.9 ± 3.4                   | 34 ± 8*                        | 1.18 ± 0.2*                                       |
| <b>P76, 10</b>                                     | 28.9 ± 3.2                   | 23 ± 9                         | 0.80 ± 0.3                                        |
| <b>TL, 10</b>                                      | 29.1 ± 2.5                   | 24 ± 10                        | 0.83 ± 0.3                                        |

Roots traits were measured on 6 d old seedlings under limited water (LW). “\*” indicates a significant difference between non-treated and GA<sub>3</sub>-treated roots of each genotype at  $p < 0.05$ . The lateral root density and lateral root number were measured on primary root.
